# Supplementary material for: Capture and electrochemical conversion of CO2 in molten alkali metal borate–carbonate blends
Source: Royal Society of Chemistry journal article supplement (doi:10.1039/d2nr03355k), 2022-01-01
Supplement: d2nr03355k1.pdf [file d2nr03355k1.pdf]

## Electronic Supplementary Information

### CAPTURE AND ELECTROCHEMICAL CONVERSION OF CO<sub>2</sub> IN MOLTEN ALKALI METAL BORATE-CARBONATE BLENDS

Lev Bromberg,<sup>a</sup> Michael P. Nitzsche<sup>b</sup> and T. Alan Hatton<sup>\*a</sup>

---

<sup>a</sup> Department of Chemical Engineering, and <sup>b</sup> Department of Mechanical Engineering, Massachusetts Institute of Technology, 77 Massachusetts Avenue, Cambridge, MA 02139 Address here.

#### Details of the electrolysis experiments

- i) The salt powder was loaded into a nickel crucible and placed into the furnace. After purging with N<sub>2</sub> flow for 30 min, the furnace was then heated to the designated temperature (550 or 600°C) within 75 min and held isothermally for 60 min to melt the salt and release residual water.
- ii) After cooling, freezing, and disassembly, a hole was drilled in the solidified salt and used to insert the cathode, which was then locked into place by a mica lid with holes for gas exchange. This ensured full submersion of the cathode regardless of variations in packing density of the initial salt powder.
- iii) After assembly, the electrolysis cell was loaded into the tube, and N<sub>2</sub> was purged for another 30 min at room temperature. The furnace was then heated to 550°C or 600°C in 75 min and held isothermally for 60 min to ensure full melting before cyclic voltammetry measurements were taken.
- iv) The gas flow was then switched to 50 cc/min of 100% CO<sub>2</sub> and held isothermally for 3 h before additional cyclic voltammetry measurements were taken. The electrolysis process was conducted in the galvanostatic mode with a constant current of -240 mA applied for 1 h, and the cathode was manually lifted out of the salt prior to cooling and freezing.
- v) The carbonaceous product and residual salt were removed from the cathode by sonication in deionized water (0.5 h). The product was then purified from the residual salt by 3 to 4- day dialysis of the suspension against excess of aqueous 1% nitric acid (membrane cut-off, 12-14 kDa) followed by the particle removal, washing in deionized water, and lyophilization.
